# Supplementary material for: Revealing the mechanism of phenoxyethanol-acid pretreatment for removing lignin from bamboo: kinetic analysis and simulation analysis
Source: Royal Society of Chemistry journal article supplement (doi:10.1039/d4gc05021e), 2025-01-01
Supplement: d4gc05021e1.pdf [file d4gc05021e1.pdf]

## Supporting information

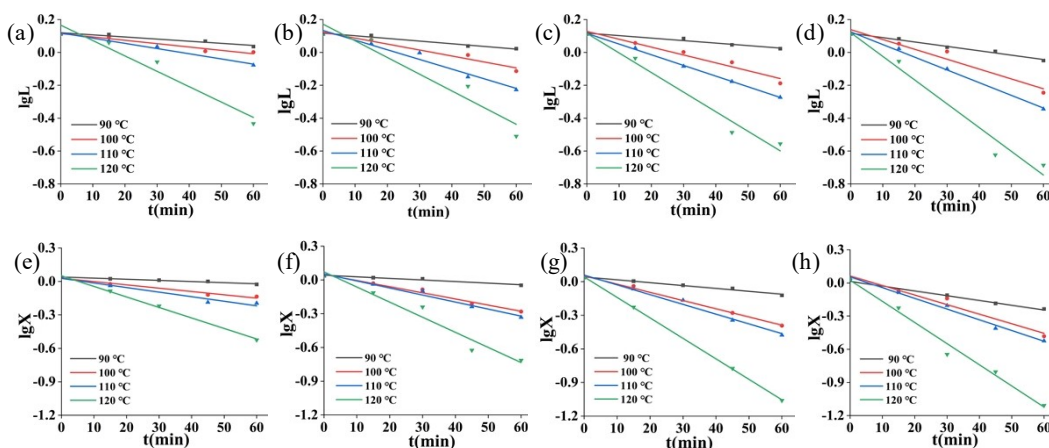

**Figure S1** (a-d)  $\lg L$ - $t$  relationship at different temperatures at 0.8-1.4% acid concentration. (e-h)  $\lg X$ - $t$  relationship at different temperatures at 0.8-1.4% acid concentration

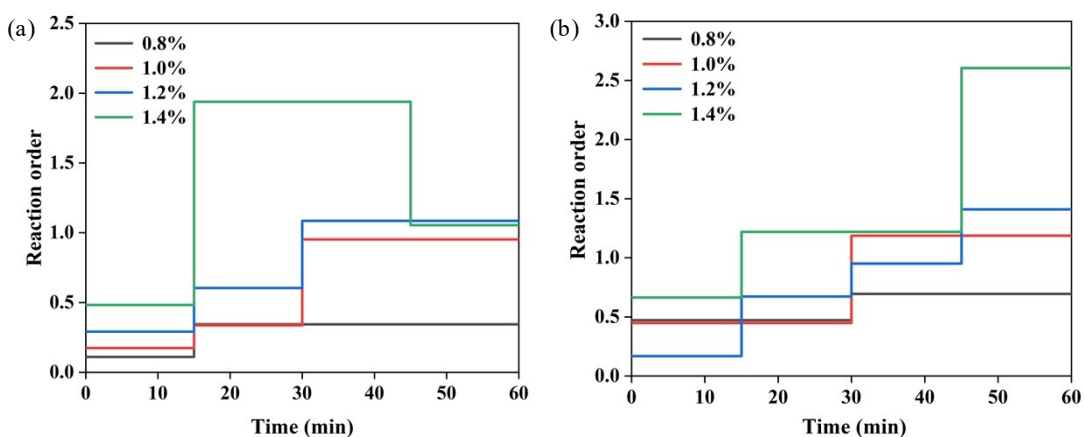

**Figure S2** (a) The reaction order of delignification rate by acid concentration at different temperatures; (b) The reaction order of xylan removal by acid concentration at different temperatures

**Table S1** Lignin and xylan dissolution fitting parameters to Eq. (6) and (8)

| Kinetic parameter | Delignification | Xylan removal |
|-------------------|-----------------|---------------|
| $\alpha$          | 19.00           | 22.50         |
| $\beta$           | 0.57            | 1.58          |
| E (KJ/mol)        | 68.00           | 77.50         |
| f                 | 0.14            | 0.03          |
| $\theta$          | 0.03            | 0.26          |

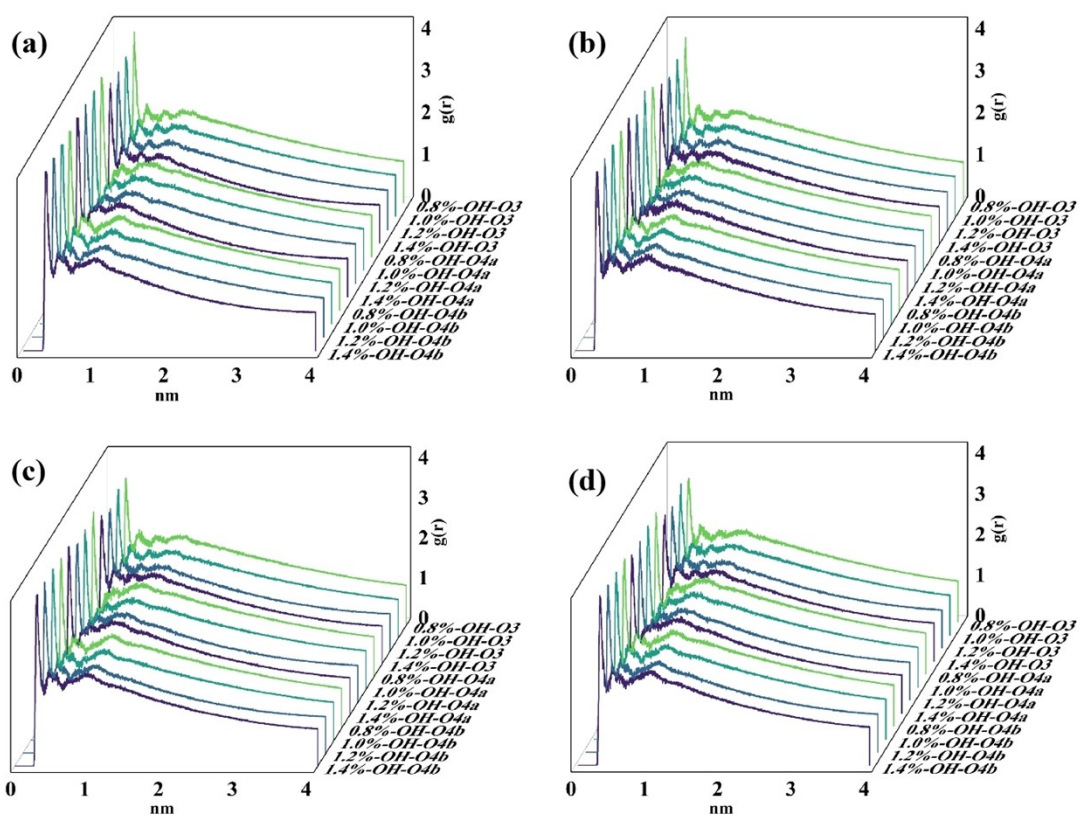

**Figure S3** Diagram of the radial distribution function of lignin and phenoxyethanol under (a) 90°C, (b) 100°C; (c) 110°C; (d) 120°C.
